# Supplementary material
Source: PubMed Central journal article supplement (PMC6224693)
Supplement: mmc1.pdf [file mmc1.pdf]

**Biophysical Journal, Volume 115**

**Supplemental Information**

**Microtubules Provide a Viscoelastic Resistance to Myocyte Motion**

**Matthew Alexander Caporizzo, Christina Yingxian Chen, Alexander Koizumi Salomon, Kenneth B. Margulies, and Benjamin L. Prosser**

**Supplementary Table 1: Values for calcium and contractility**

| Contractility Transient                    | Control |       | Colchicine |       | P     | significance |
|--------------------------------------------|---------|-------|------------|-------|-------|--------------|
|                                            | Mean    | SE    | Mean       | SE    |       |              |
| Resting Sarcomere Length ( $\mu\text{m}$ ) | 1.826   | 0.008 | 1.829      | 0.01  | 0.997 |              |
| Peak % shortening                          | 9.38    | 0.507 | 11.94      | 0.651 | 0.003 | **           |
| Departure Velocity ( $\mu\text{m/s}$ )     | -3.50   | 0.264 | -5.06      | 0.374 | 0.001 | ***          |
| Return Velocity ( $\mu\text{m/s}$ )        | 2.53    | 0.198 | 3.39       | 0.199 | 0.003 | **           |
| t to peak 90% (ms)                         | 81.2    | 3.0   | 74.9       | 1.9   | 0.07  |              |
| t to peak 50% (ms)                         | 34.2    | 1.3   | 30.2       | 1.2   | 0.029 | *            |
| t to baseline 90% (ms)                     | 241.1   | 11.6  | 221.7      | 9.9   | 0.206 |              |
| t to baseline 50% (ms)                     | 147.4   | 9.2   | 144.8      | 8.2   | 0.836 |              |
| Calcium Transient                          | Control |       | Colchicine |       | P     |              |
|                                            | Mean    | SE    | Mean       | SE    |       |              |
| Amplitude ( $F/F_0$ )                      | 6.18    | 0.29  | 6.11       | 0.28  | 0.853 |              |
| Time to 50% Rise (ms)                      | 18.09   | 0.43  | 18.19      | 0.51  | 0.889 |              |
| Time to 90% Rise (ms)                      | 27.91   | 1.04  | 29.71      | 1.33  | 0.296 |              |
| Time to 50% Decay (ms)                     | 192.4   | 4.8   | 192.7      | 3.2   | 0.958 |              |
| Time to 90% Decay (ms)                     | 426.7   | 11.9  | 406.7      | 10.1  | 0.201 |              |

**Supplementary Movie 1:** Nanoindentation of rat cardiomyocyte. AdV-EMTB 3x GFP transfected in culture for 48 h enabled MT imaging during nanoindentation. During indentation MTs deform significantly, while sarcomeres are not stretched. Two color overlay shows initial frame (pre-indentation) in blue and subsequent frames (during indentation) in orange. Colocalization appears white.
